# Supplementary material for: Reactions of N2O and CO on neutral Rh10On clusters: a density functional study
Source: Royal Society of Chemistry journal article supplement (doi:10.1039/d3cp04929a), 2023-12-19
Supplement: d3cp04929a2.xlsx [file d3cp04929a2.xlsx]

## Sheet: CO to CO2 TPSS
CO to CO2
Rh10O5 to Rh10O4							Rh10O4 to Rh10O3							Rh10O3 to Rh10O2							Rh10O2 to Rh10O							Rh10O to Rh10
				dEV							dEV							dEV							dEV
LE Rh10O5 + CO	Kick0757	-89.4605	-102.835	0			LE Rh10O4 + CO	Kick0609	-83.2893	-96.664	0			LE Rh10O3 + CO	Kick0549	-76.0008	-89.3755	0			LE Rh10O2 + CO	Kick0680	-69.3852	-82.7599	0			LE Rh10O + CO	Kick0205	-62.611	-75.9857	0
Matching Intermediate (Rh10O5-CO)	int_guess	-104.807	-104.807	-1.97135			Matching Intermediate (Rh10O4-CO)	int_guess	-98.731	-98.731	-2.067			Matching Intermediate (Rh10O3-CO)	int_guess	-91.3543	-91.3543	-1.9788			Matching Intermediate (Rh10O2-CO)	Kick0104	-85.0739	-85.0739	-2.314			Matching Intermediate (Rh10O-CO)	Kick0306	-76.1067	-76.1067	-0.121008
Matching Rh10O4 + CO2	Kick0514	-82.128	-102.256	0.5792			Matching Rh10O3 + CO2	Kick0826	-75.9754	-96.1034	0.5606			Matching Rh10O2 + CO2	Kick0133	-68.9926	-89.1206	0.2549			Matching Rh10O + CO2	Kick0205	-62.611	-82.739	0.0209			Matching Rh10 + CO2		-55.2522	-75.3802	0.6055
Matching Rh10O5 + CO	reactant_guess	-89.3112	-102.686	0.1493			Matching Rh10O4 + CO	Kick0743	-81.9907	-95.3654	1.2986			Matching Rh10O3 + CO	Kick0549	-76.0008	-89.3755	0			Matching Rh10O2 + CO	Kick0471	-68.9863	-82.361	0.3989
Matching Intermediate (Rh10O5-CO)	int_guess_2	-104.609	-104.609	-1.7742			Matching Intermediate (Rh10O4-CO)	int_guess	-97.8138	-97.8138	-1.1498			Matching Intermediate (Rh10O3-CO)	int_guess_2	-90.84	-90.84	-1.4645			Matching Intermediate (Rh10O2-CO)	Kick0174	-84.8728	-84.8728	-2.1129
LE Rh10O4 + CO2	Kick0609	-83.2903	-103.418	-0.5831			LE Rh10O3 + CO2	Kick0549	-76.0008	-96.1288	0.5352			LE Rh10O2 + CO2	Kick0680	-69.3862	-89.5142	-0.1387			LE Rh10O + CO2	Kick0205	-62.611	-82.739	0.0209
CO	-13.3747
CO2	-20.128
octet
CO to CO2
Rh10O5 to Rh10O4							Rh10O4 to Rh10O3							Rh10O3 to Rh10O2							Rh10O2 to Rh10O							Rh10O to Rh10
				dEV							dEV							dEV							dEV
LE Rh10O5 + CO	Kick0757	-89.4605	-102.835	0			LE Rh10O4 + CO	Kick0609	-83.2893	-96.664	0			LE Rh10O3 + CO	Kick0549	-76.0008	-89.3755	0			LE Rh10O2 + CO	Kick0680	-69.3852	-82.7599	0			LE Rh10O + CO	Kick0205	-62.611	-75.9857	0
	2							2	-83.318	-96.6927	-0.0287				2	-76.0995	-89.4742	-0.0987				2	-69.7603	-83.135	-0.3751				2	-62.3751	-75.7498	0.2359
	4	-89.465	-102.84	-0.0045				4	-83.3453	-96.72	-0.056				4	-76.0286	-89.4033	-0.0278				4	-69.6203	-82.995	-0.2351				4	-62.4166	-75.7913	0.1944
	6	-89.4582	-102.833	0.0023				6	-83.302	-96.6767	-0.0127				6	-76.0209	-89.3956	-0.0201				6	-69.4628	-82.8375	-0.0776				6	-62.5781	-75.9528	0.0329
	8	-89.4605	-102.835	0				8	-83.2893	-96.664	0				8	-76.0008	-89.3755	0				8	-69.3852	-82.7599	0				8	-62.611	-75.9857	0
	10	-89.4244	-102.799	0.0361				10	-83.2594	-96.6341	0.0299				10	-75.8851	-89.2598	0.115662				10	-69.3593	-82.734	0.0259				10	-62.6135	-75.9882	-0.0025
	12	-89.4406	-102.815	0.0199078				12	-83.051	-96.4257	0.2383				12	-75.8598	-89.2345	0.141				12	-69.2804	-82.6551	0.1048				12	-62.7264	-76.1011	-0.1154
	14	-89.2381	-102.613	0.2224				14	-82.9462	-96.3209	0.3431				14	-75.705	-89.0797	0.295764				14	-69.092	-82.4667	0.293161				14	-62.7322	-76.1069	-0.1212
	16	-89.0851	-102.46	0.3754				16	-82.6108	-95.9855	0.6785				16	-75.4074	-88.7821	0.593422				16	-69.3852	-82.7599	0				16	-62.4937	-75.8684	0.1173
Matching Intermediate (Rh10O5-CO)	int_guess	-104.807	-104.807	-1.97135			Matching Intermediate (Rh10O4-CO)	int_guess	-98.731	-98.731	-2.067			Matching Intermediate (Rh10O3-CO)	int_guess	-91.3543	-91.3543	-1.9788			Matching Intermediate (Rh10O2-CO)	Kick0104	-85.0739	-85.0739	-2.314			Matching Intermediate (Rh10O-CO)	Kick0306	-76.1067	-76.1067	-0.121008
	2	-104.733	-104.733	-1.8978				2	-98.7451	-98.7451	-2.0811				2	-91.4286	-91.4286	-2.0531				2	-85.2338	-85.2338	-2.4739				2	-75.8521	-75.8521	0.13357
	4	-104.662	-104.662	-1.82687				4	-98.792	-98.792	-2.128				4	-91.4027	-91.4027	-2.0272				4	-85.1679	-85.1679	-2.408				4	-76.0063	-76.0063	-0.0205506
	6	-104.81	-104.81	-1.9745				6	-98.8599	-98.8599	-2.1959				6	-91.3201	-91.3201	-1.9446				6	-85.0342	-85.0342	-2.2743				6	-76.0561	-76.0561	-0.0704
	8	-104.807	-104.807	-1.97135				8	-98.731	-98.731	-2.067				8	-91.3543	-91.3543	-1.9788				8	-85.0739	-85.0739	-2.314				8	-76.1067	-76.1067	-0.121008
	10	-104.824	-104.824	-1.98873				10	-98.7114	-98.7114	-2.0474				10	-91.3642	-91.3642	-1.9887				10	-85.0282	-85.0282	-2.26827				10	-76.1194	-76.1194	-0.1337
	12	-104.809	-104.809	-1.97386				12	-98.6019	-98.6019	-1.9379				12	-91.2409	-91.2409	-1.8654				12	-84.8574	-84.8574	-2.0975				12	-76.2094	-76.2094	-0.2237
	14	-104.549	-104.549	-1.71338				14	-98.3728	-98.3728	-1.70878				14	-91.0363	-91.0363	-1.66077				14	-84.6384	-84.6384	-1.8785				14	-76.2376	-76.2376	-0.2519
	16	-104.232	-104.232	-1.39665				16	-97.8443	-97.8443	-1.1803				16	-90.6826	-90.6826	-1.30706				16	-84.3782	-84.3782	-1.6183				16	-76.0248	-76.0248	-0.0391
Matching Rh10O4 + CO2	Kick0514	-82.128	-102.256	0.5792			Matching Rh10O3 + CO2	Kick0826	-75.9754	-96.1034	0.5606			Matching Rh10O2 + CO2	Kick0133	-68.9926	-89.1206	0.2549			Matching Rh10O + CO2	Kick0205	-62.611	-82.739	0.0209			Matching Rh10 + CO2		-55.2522	-75.3802	0.6055
	2							2							2		-20.128					2	-62.3754	-82.5034	0.2565				2	-55.0983	-75.2263	0.7594
	4							4	-75.8935	-96.0215	0.64254				4		-20.128					4	-62.4166	-82.5446	0.2153				4	-55.2012	-75.3292	0.6565
	6	-81.9176	-102.046	0.789597				6	-75.9587	-96.0867	0.5773				6	-69.0019	-89.1299	0.2456				6	-62.5825	-82.7105	0.0494				6	-55.2322	-75.3602	0.6255
	8	-82.128	-102.256	0.5792				8	-75.9754	-96.1034	0.5606				8	-68.9926	-89.1206	0.2549				8	-62.611	-82.739	0.0209				8	-55.2522	-75.3802	0.6055
	10	-82.1223	-102.25	0.5849				10	-75.9874	-96.1154	0.5486				10	-69.0262	-89.1542	0.2213				10	-62.6135	-82.7415	0.0184				10	-55.4038	-75.5318	0.4539
	12	-81.8989	-102.027	0.808326				12	-75.9121	-96.0401	0.6239				12	-69.0419	-89.1699	0.2056				12	-62.7264	-82.8544	-0.0945				12	-55.6617	-75.7897	0.196
	14	-81.7072	-101.835	1				14	-75.8167	-95.9447	0.7193				14	-69.0085	-89.1365	0.239				14	-62.7322	-82.8602	-0.1003				14	-55.668	-75.796	0.189705
	16	-81.5458	-101.674	1.16145				16	-75.5085	-95.6365	1.02748				16		-20.128					16	-62.4937	-82.6217	0.1382				16	-55.8723	-76.0003	-0.0146
Matching Rh10O5 + CO	reactant_guess	-89.3112	-102.686	0.1493			Matching Rh10O4 + CO	Kick0743	-81.9907	-95.3654	1.2986			Matching Rh10O3 + CO	Kick0549	-76.0008	-89.3755	0			Matching Rh10O2 + CO	Kick0471	-68.9863	-82.361	0.3989
	2	-89.4249	-102.8	0.0356				2		-13.3747					2	-76.0995	-89.4742	-0.0987				2
	4	-89.4043	-102.779	0.0562				4	-82.0241	-95.3988	1.2652				4	-76.0286	-89.4033	-0.0278				4	-68.9311	-82.3058	0.4541
	6	-89.4031	-102.778	0.0574				6	-82.0733	-95.448	1.216				6	-76.0209	-89.3956	-0.0201				6	-68.9949	-82.3696	0.3903
	8	-89.3112	-102.686	0.1493				8	-81.9907	-95.3654	1.2986				8	-76.0008	-89.3755	0				8	-68.9863	-82.361	0.3989
	10	-89.1556	-102.53	0.304854				10	-81.9724	-95.3471	1.3169				10	-75.8851	-89.2598	0.115662				10	-68.9934	-82.3681	0.391822
	12	-88.9499	-102.325	0.5106				12	-81.9195	-95.2942	1.3698				12	-75.8598	-89.2345	0.141				12	-69.0194	-82.3941	0.3658
	14	-88.6495	-102.024	0.811028				14	-81.7938	-95.1685	1.4955				14	-75.705	-89.0797	0.295764				14	-68.9896	-82.3643	0.3956
	16							16	-81.4021	-94.7768	1.8872				16	-75.4074	-88.7821	0.593422				16	-68.7731	-82.1478	0.612121
Matching Intermediate (Rh10O5-CO)	int_guess_2	-104.609	-104.609	-1.7742			Matching Intermediate (Rh10O4-CO)	int_guess	-97.8138	-97.8138	-1.1498			Matching Intermediate (Rh10O3-CO)	int_guess_2	-90.84	-90.84	-1.4645			Matching Intermediate (Rh10O2-CO)	Kick0174	-84.8728	-84.8728	-2.1129
	2	-104.768	-104.768	-1.9327				2	-97.7477	-97.7477	-1.0837				2		0					2		0
	4	-104.722	-104.722	-1.8871				4							4	-90.8465	-90.8465	-1.471				4	-84.8237	-84.8237	-2.0638
	6	-104.65	-104.65	-1.8147				6	-97.8468	-97.8468	-1.1828				6	-90.9109	-90.9109	-1.5354				6	-84.8743	-84.8743	-2.1144
	8	-104.609	-104.609	-1.7742				8	-97.8138	-97.8138	-1.1498				8	-90.84	-90.84	-1.4645				8	-84.8728	-84.8728	-2.1129
	10	-104.484	-104.484	-1.6491				10	-97.6339	-97.6339	-0.9699				10	-90.7219	-90.7219	-1.34642				10	-84.7717	-84.7717	-2.0118
	12	-104.263	-104.263	-1.4275				12	-97.4415	-97.4415	-0.777514				12	-90.547	-90.547	-1.17152				12	-84.7445	-84.7445	-1.9846
	14		0	102.835				14	-97.2232	-97.2232	-0.5592				14	-90.333	-90.333	-0.9575				14	-84.6478	-84.6478	-1.88791
	16		0	102.835				16	-97.0166	-97.0166	-0.3526				16	-90.0414	-90.0414	-0.665944				16	-84.4634	-84.4634	-1.70349
LE Rh10O4 + CO2	Kick0609	-83.2903	-103.418	-0.5831			LE Rh10O3 + CO2	Kick0549	-76.0008	-96.1288	0.5352			LE Rh10O2 + CO2	Kick0680	-69.3862	-89.5142	-0.1387			LE Rh10O + CO2	Kick0205	-62.611	-82.739	0.0209
	2							2	-76.0995	-96.2275	0.4365				2	-69.7612	-89.8892	-0.5137				2	-62.3754	-82.5034	0.2565
	4	-83.3442	-103.472	-0.637				4	-76.0286	-96.1566	0.5074				4	-69.6182	-89.7462	-0.3707				4	-62.4166	-82.5446	0.2153
	6	-83.3028	-103.431	-0.5956				6	-76.0218	-96.1498	0.5142				6	-69.4649	-89.5929	-0.2174				6	-62.5825	-82.7105	0.0494
	8	-83.2903	-103.418	-0.5831				8	-76.0008	-96.1288	0.5352				8	-69.3862	-89.5142	-0.1387				8	-62.611	-82.739	0.0209
	10	-83.2614	-103.389	-0.5542				10	-75.8851	-96.0131	0.650862				10	-69.3592	-89.4872	-0.1117				10	-62.6135	-82.7415	0.0184
	12	-83.0519	-103.18	-0.3447				12	-75.8598	-95.9878	0.6762				12	-69.28	-89.408	-0.0325				12	-62.7264	-82.8544	-0.0945
	14	-82.9452	-103.073	-0.238				14	-75.705	-95.833	0.830964				14	-69.094	-89.222	0.1535				14	-62.7322	-82.8602	-0.1003
	16	-82.6088	-102.737	0.0984				16	-75.4074	-95.5354	1.12862				16	-68.8752	-89.0032	0.372324				16	-62.4937	-82.6217	0.1382

## Sheet: N2O to N2 TPSS
N2O to N2
Rh to Rh10O							Rh10O to Rh10O2							Rh10O2 to Rh10O3							Rh10O3 to Rh10O4							Rh10O4 to Rh10O5
				dEV							dEV							dEV							dEV							dEV
Matching Rh10 + N2O		-55.6617	-74.0121	0			LE Rh10O + N2O	Kick0205	-62.7264	-81.0768	0			LE Rh10O2 + N2O	Kick0680	-69.2818	-87.6322	0			LE Rh10O3 + N2O	Kick0549	-75.86	-94.2104	0			LE Rh10O4 + N2O	Kick0609	-83.0516	-101.402	0
Matching Intermediate (Rh10O-N2)	Kick0124	-78.9848	-78.9848	-4.97272			Matching Intermediate (Rh10O2-N2)	int_guess	-85.5992	-85.5992	-4.52238			Matching Intermediate (Rh10O3-N2)	int_guess	-92.0625	-92.0625	-4.4303			Matching Intermediate (Rh10O4-N2)	int_guess	-98.0048	-98.0048	-3.79439			Matching Intermediate (Rh10O5-N2)	int_guess_2	-105.126	-105.126	-3.72404
LE Rh10O + N2	Kick0205	-62.7264	-77.721	-3.7089			Matching Rh10O2 + N2	Kick0471	-69.0195	-84.0141	-2.9373			Matching Rh10O3 + N2	Kick0549	-75.86	-90.8546	-3.2224			Matching Rh10O4 + N2	Kick0743	-81.9219	-96.9165	-2.7061			Matching Rh10O5 + N2	product_guess	-89.0498	-104.044	-2.6424
							Matching Rh10O + N2O	Kick0205	-62.6135	-80.9639	0.1129			Matching Rh10O2 + N2O	Kick0133	-69.0244	-87.3748	0.257429			Matching Rh10O3 + N2O	Kick0826	-75.9862	-94.3366	-0.1262			Matching Rh10O4 + N2O	Kick0514	-82.1223	-100.473	0.9293
							Matching Intermediate (Rh10O2-N2) *180 deg rotate	Kick0026	-84.7256	-84.7256	-3.6488			Matching Intermediate (Rh10O3-N2)	int_guess	-91.9246	-91.9246	-4.2924			Matching Intermediate (Rh10O4-N2)	int_guess	-99.5748	-99.5748	-5.3644			Matching Intermediate (Rh10O5-N2)	int_guess	-105.971	-105.971	-4.56871
							LE Rh10O2 + N2	Kick0680	-69.3603	-84.3549	-3.2781			LE Rh10O3 + N2	Kick0549	-75.8852	-90.8798	-3.2476			LE Rh10O4 + N2	Kick0609	-83.2609	-98.2555	-4.0451			LE Rh10O5 + N2	Kick0757	-89.4244	-104.419	-3.017
N2	-14.9946
N2O	-18.3504
octet
N2O to N2
Rh to Rh10O							Rh10O to Rh10O2							Rh10O2 to Rh10O3							Rh10O3 to Rh10O4							Rh10O4 to Rh10O5
				dEV							dEV							dEV							dEV							dEV
Matching Rh10 + N2O		-55.2522	-73.6026	4.003			LE Rh10O + N2O	Kick0205	-62.611	-80.9614	0			LE Rh10O2 + N2O	Kick0680	-69.3873	-87.7377	0			LE Rh10O3 + N2O	Kick0549	-76.0011	-94.3515	0			LE Rh10O4 + N2O	Kick0609	-83.2903	-101.641	0
	2	-55.0983	-73.4487	4.1569				2	-62.3751	-80.7255	0.2359				2	-69.7607	-88.1111	-0.3734				2	-76.0994	-94.4498	-0.0983				2
	4	-55.2012	-73.5516	4.054				4	-62.4166	-80.767	0.1944				4	-69.6176	-87.968	-0.2303				4	-76.028	-94.3784	-0.0269				4	-83.3462	-101.697	-0.0558936
	6	-55.2322	-73.5826	4.023				6	-62.5781	-80.9285	0.0329				6	-69.465	-87.8154	-0.0777				6	-76.0223	-94.3727	-0.0212				6	-83.3011	-101.651	-0.0108
	8	-55.2522	-73.6026	4.003				8	-62.611	-80.9614	0				8	-69.3873	-87.7377	0				8	-76.0011	-94.3515	0				8	-83.2903	-101.641	0
	10	-55.4038	-73.7542	3.8514				10	-62.6135	-80.9639	-0.0025				10	-69.3596	-87.71	0.0277				10	-75.8852	-94.2356	0.1159				10	-83.2594	-101.61	0.0309
	12	-55.6617	-74.0121	3.5935				12	-62.7264	-81.0768	-0.1154				12	-69.2818	-87.6322	0.1055				12	-75.86	-94.2104	0.1411				12	-83.0516	-101.402	0.2387
	14	-55.668	-74.0184	3.5872				14	-62.7322	-81.0826	-0.1212				14	-69.093	-87.4434	0.2943				14	-75.7046	-94.055	0.2965				14	-82.9458	-101.296	0.3445
	16	-55.8723	-74.2227	3.3829				16	-62.4937	-80.8441	0.1173				16							16	-75.4077	-93.7581	0.593417				16	-82.6106	-100.961	0.6797
Matching Intermediate (Rh10O-N2)	Kick0124	-78.9567	-78.9567	-1.3511			Matching Intermediate (Rh10O2-N2)	int_guess	-85.5881	-85.5881	-4.6267			Matching Intermediate (Rh10O3-N2)	int_guess	-92.2763	-92.2763	-4.53861			Matching Intermediate (Rh10O4-N2)	int_guess	-98.3087	-98.3087	-3.9572			Matching Intermediate (Rh10O5-N2)	int_guess_2	-105.585	-105.585	-3.9446
	2							2							2	-92.3203	-92.3203	-4.5826				2							2
	4	-78.8116	-78.8116	-1.206				4	-85.4482	-85.4482	-4.4868				4	-92.328	-92.328	-4.59033				4	-98.3368	-98.3368	-3.9853				4	-105.729	-105.729	-4.0887
	6	-78.9401	-78.9401	-1.3345				6	-85.5218	-85.5218	-4.5604				6	-92.2474	-92.2474	-4.5097				6	-98.3407	-98.3407	-3.9892				6	-105.679	-105.679	-4.0382
	8	-78.9567	-78.9567	-1.3511				8	-85.5881	-85.5881	-4.6267				8	-92.2763	-92.2763	-4.53861				8	-98.3087	-98.3087	-3.9572				8	-105.585	-105.585	-3.9446
	10	-78.965	-78.965	-1.35944				10	-85.5788	-85.5788	-4.6174				10	-92.1401	-92.1401	-4.4024				10	-98.1136	-98.1136	-3.76209				10	-105.438	-105.438	-3.7976
	12	-78.9848	-78.9848	-1.37922				12	-85.5992	-85.5992	-4.63778				12	-92.0625	-92.0625	-4.3248				12	-98.0048	-98.0048	-3.65329				12	-105.126	-105.126	-3.48534
	14	-78.995	-78.995	-1.3894				14	-85.4784	-85.4784	-4.51702				14	-92.0003	-92.0003	-4.2626				14	-97.872	-97.872	-3.5205				14	-104.774	-104.774	-3.13295
	16	-78.3522	-78.3522	-0.746618				16	-85.3987	-85.3987	-4.43726				16	-91.8642	-91.8642	-4.12652				16	-97.5983	-97.5983	-3.24681				16	-104.379	-104.379	-2.73864
LE Rh10O + N2	Kick0205	-62.611	-77.6056	0			Matching Rh10O2 + N2	Kick0471	-68.9863	-83.9809	-3.0195			Matching Rh10O3 + N2	Kick0549	-76.0011	-90.9957	-3.258			Matching Rh10O4 + N2	Kick0743	-81.9911	-96.9857	-2.6342			Matching Rh10O5 + N2	product_guess	-89.396	-104.391	-2.7499
	2	-62.3751	-77.3697	0.2359				2							2	-76.0994	-91.094	-3.3563				2							2	-89.5116	-104.506	-2.8655
	4	-62.4166	-77.4112	0.1944				4	-68.9334	-83.928	-2.96663				4	-76.028	-91.0226	-3.2849				4	-82.0241	-97.0187	-2.6672				4	-89.532	-104.527	-2.8859
	6	-62.5781	-77.5727	0.0329				6	-68.9967	-83.9913	-3.0299				6	-76.0223	-91.0169	-3.2792				6	-82.0733	-97.0679	-2.7164				6	-89.4739	-104.469	-2.8278
	8	-62.611	-77.6056	0				8	-68.9863	-83.9809	-3.0195				8	-76.0011	-90.9957	-3.258				8	-81.9911	-96.9857	-2.6342				8	-89.396	-104.391	-2.7499
	10	-62.6135	-77.6081	-0.0025				10	-68.9925	-83.9871	-3.0257				10	-75.8852	-90.8798	-3.1421				10	-81.9713	-96.9659	-2.6144				10	-89.2357	-104.23	-2.5896
	12	-62.7264	-77.721	-0.1154				12	-69.0195	-84.0141	-3.0527				12	-75.86	-90.8546	-3.1169				12	-81.9219	-96.9165	-2.565				12	-89.0498	-104.044	-2.4037
	14	-62.7322	-77.7268	-0.1212				14	-68.9903	-83.9849	-3.0235				14	-75.7046	-90.6992	-2.9615				14	-81.7936	-96.7882	-2.4367				14	-88.798	-103.793	-2.1519
	16	-62.4937	-77.4883	0.1173				16	-68.7826	-83.7772	-2.81583				16	-75.4077	-90.4023	-2.66458				16	-81.4068	-96.4014	-2.0499				16	-88.4205	-103.415	-1.77437
							Matching Rh10O + N2O	Kick0205	-62.611	-80.9614	0			Matching Rh10O2 + N2O	Kick0133	-68.9926	-87.343	0.3947			Matching Rh10O3 + N2O	Kick0826	-75.9759	-94.3263	0.0252			Matching Rh10O4 + N2O	Kick0514	-82.128	-100.478	1.1623
								2	-62.3751	-80.7255	0.2359				2	-69.0419	-87.3923	0.3454				2	-75.911	-94.2614	0.0901				2
								4	-62.4171	-80.7675	0.1939				4							4	-75.8888	-94.2392	0.112319				4
								6	-62.5781	-80.9285	0.0329				6	-69.0033	-87.3537	0.384				6	-75.9174	-94.2678	0.0837				6	-81.9176	-100.268	1.3727
								8	-62.611	-80.9614	0				8	-68.9926	-87.343	0.3947				8	-75.9759	-94.3263	0.0252				8	-82.128	-100.478	1.1623
								10	-62.6135	-80.9639	-0.0025				10	-69.0244	-87.3748	0.362929				10	-75.9862	-94.3366	0.0149				10	-82.1223	-100.473	1.168
								12	-62.7264	-81.0768	-0.1154				12	-69.0436	-87.394	0.3437				12	-75.9111	-94.2615	0.09				12	-81.8989	-100.249	1.39143
								14	-62.7322	-81.0826	-0.1212				14	-69.0081	-87.3585	0.379176				14	-75.8148	-94.1652	0.186253				14	-81.7072	-100.058	1.5831
								16	-62.4937	-80.8441	0.1173				16	-68.7983	-87.1487	0.589				16	-75.5097	-93.8601	0.4914				16	-81.5458	-99.8962	1.74455
							Matching Intermediate (Rh10O2-N2) *180 deg rotate	Kick0026	-84.7931	-84.7931	-3.8317			Matching Intermediate (Rh10O3-N2)	int_guess	-91.97	-91.97	-4.2323			Matching Intermediate (Rh10O4-N2)	int_guess	-99.5803	-99.5803	-5.2288			Matching Intermediate (Rh10O5-N2)	int_guess	-106.017	-106.017	-4.3768
								2	-85.0745	-85.0745	-4.1131				2	-91.9015	-91.9015	-4.1638				2							2	-106.138	-106.138	-4.4978
								4	-84.9452	-84.9452	-3.9838				4	-91.9259	-91.9259	-4.1882				4	-99.6676	-99.6676	-5.3161				4
								6	-84.8535	-84.8535	-3.8921				6	-91.9404	-91.9404	-4.2027				6	-99.6284	-99.6284	-5.2769				6	-106.128	-106.128	-4.4872
								8	-84.7931	-84.7931	-3.8317				8	-91.97	-91.97	-4.2323				8	-99.5803	-99.5803	-5.2288				8	-106.017	-106.017	-4.3768
								10	-84.7256	-84.7256	-3.7642				10	-91.9246	-91.9246	-4.1869				10	-99.5748	-99.5748	-5.2233				10	-105.971	-105.971	-4.33001
								12	-84.6217	-84.6217	-3.6603				12	-91.8357	-91.8357	-4.09803				12	-99.3591	-99.3591	-5.0076				12	-105.879	-105.879	-4.23879
								14	-84.4093	-84.4093	-3.4479				14	-91.6695	-91.6695	-3.9318				14	-99.0428	-99.0428	-4.6913				14	-105.658	-105.658	-4.01719
								16	-84.1119	-84.1119	-3.15053				16	-91.3909	-91.3909	-3.6532				16	-98.5832	-98.5832	-4.2317				16	-105.378	-105.378	-3.73691
							LE Rh10O2 + N2	Kick0680	-69.3873	-84.3819	-3.4205			LE Rh10O3 + N2	Kick0549	-76.0011	-90.9957	-3.258			LE Rh10O4 + N2	Kick0609	-83.2908	-98.2854	-3.9339			LE Rh10O5 + N2	Kick0757	-89.4605	-104.455	-2.8144
								2		-14.9946	65.9668				2	-76.0994	-91.094	-3.3563				2	-83.3217	-98.3163	-3.96481				2
								4	-69.6182	-84.6128	-3.6514				4	-76.028	-91.0226	-3.2849				4	-83.2488	-98.2434	-3.8919				4	-89.465	-104.46	-2.8189
								6	-69.4628	-84.4574	-3.496				6	-76.0223	-91.0169	-3.2792				6							6	-89.4582	-104.453	-2.8121
								8	-69.3873	-84.3819	-3.4205				8	-76.0011	-90.9957	-3.258				8	-83.2908	-98.2854	-3.9339				8	-89.4605	-104.455	-2.8144
								10	-69.3603	-84.3549	-3.3935				10	-75.8852	-90.8798	-3.1421				10	-83.2609	-98.2555	-3.904				10	-89.4244	-104.419	-2.7783
								12	-69.2806	-84.2752	-3.3138				12	-75.86	-90.8546	-3.1169				12	-83.0489	-98.0435	-3.69203				12	-89.4406	-104.435	-2.79449
								14	-69.094	-84.0886	-3.1272				14	-75.7046	-90.6992	-2.9615				14	-82.945	-97.9396	-3.5881				14	-89.2381	-104.233	-2.592
								16	-68.8752	-83.8698	-2.90838				16	-75.4077	-90.4023	-2.66458				16	-82.6108	-97.6054	-3.2539				16	-89.0851	-104.08	-2.439

## Sheet: CO to CO2 BP86
CO to CO2
Rh10O5 to Rh10O4							Rh10O4 to Rh10O3							Rh10O3 to Rh10O2							Rh10O2 to Rh10O							Rh10O to Rh10
				dEV							dEV							dEV							dEV
LE Rh10O5 + CO	Kick0757	-79.7703	-92.8963	0			LE Rh10O4 + CO	Kick0609	-74.0478	-87.1738	0			LE Rh10O3 + CO	Kick0549	-67.3774	-80.5034	0			LE Rh10O2 + CO	Kick0680	-61.2868	-74.4128	0			LE Rh10O + CO	Kick0205	-54.9562	-68.0822	0
Matching Intermediate (Rh10O5-CO)	int_guess	-94.5085	-94.5085	-1.6122			Matching Intermediate (Rh10O4-CO)	int_guess	-88.8273	-88.8273	-1.6535			Matching Intermediate (Rh10O3-CO)	int_guess	-82.1729	-82.1729	-1.6695			Matching Intermediate (Rh10O2-CO)	Kick0104	-76.3469	-76.3469	-1.9341			Matching Intermediate (Rh10O-CO)	Kick0306	-68.1354	-68.1354	-0.0532
Matching Rh10O4 + CO2	Kick0514	-73.0494	-92.859	0.0373			Matching Rh10O3 + CO2	Kick0826	-67.305	-87.1146	0.0592			Matching Rh10O2 + CO2	Kick0133	-60.8478	-80.6574	-0.154			Matching Rh10O + CO2	Kick0205	-54.9562	-74.7658	-0.353			Matching Rh10 + CO2		-48.1261	-67.9357	0.1465
Matching Rh10O5 + CO	reactant_guess	-79.6146	-92.7406	0.1557			Matching Rh10O4 + CO	Kick0743	-72.8019	-85.9279	1.2459			Matching Rh10O3 + CO	Kick0549	-67.3774	-80.5034	0			Matching Rh10O2 + CO	Kick0471	-60.8413	-73.9673	0.4455
Matching Intermediate (Rh10O5-CO)	int_guess_2	-94.6485	-94.6485	-1.7522			Matching Intermediate (Rh10O4-CO)	int_guess	-88.0669	-88.0669	-0.8931			Matching Intermediate (Rh10O3-CO)	int_guess_2	-81.8725	-81.8725	-1.3691			Matching Intermediate (Rh10O2-CO)	Kick0174	-76.0938	-76.0938	-1.681
LE Rh10O4 + CO2	Kick0609	-74.0478	-93.8574	-0.9611			LE Rh10O3 + CO2	Kick0549	-67.3774	-87.187	-0.0132			LE Rh10O2 + CO2	Kick0680	-61.2868	-81.0964	-0.593			LE Rh10O + CO2	Kick0205	-54.9562	-74.7658	-0.353
CO	-13.126
CO2	-19.8096
octet
CO to CO2
Rh10O5 to Rh10O4							Rh10O4 to Rh10O3							Rh10O3 to Rh10O2							Rh10O2 to Rh10O							Rh10O to Rh10
				dEV							dEV							dEV							dEV
LE Rh10O5 + CO	Kick0757	-79.7703	-92.8963	0			LE Rh10O4 + CO	Kick0609	-74.0478	-87.1738	0			LE Rh10O3 + CO	Kick0549	-67.3774	-80.5034	0			LE Rh10O2 + CO	Kick0680	-61.2868	-74.4128	0			LE Rh10O + CO	Kick0205	-54.9562	-68.0822	0
	2							2	-74.1083	-87.2343	-0.0605				2	-67.4239	-80.5499	-0.0465				2	-61.6772	-74.8032	-0.3904				2	-54.7453	-67.8713	0.2109
	4	-79.7294	-92.8554	0.0409				4	-74.1261	-87.2521	-0.0783				4	-67.4386	-80.5646	-0.0612				4	-61.5382	-74.6642	-0.2514				4	-54.9042	-68.0302	0.052
	6	-79.7153	-92.8413	0.055				6	-74.1512	-87.2772	-0.1034				6	-67.4392	-80.5652	-0.0618				6	-61.3915	-74.5175	-0.1047				6	-54.9419	-68.0679	0.0143
	8	-79.7703	-92.8963	0				8	-74.0479	-87.1739	-0.0001				8	-67.3771	-80.5031	0.0003				8	-61.2867	-74.4127	0.0001				8	-54.9563	-68.0823	-0.0001
	10	-79.7093	-92.8353	0.061				10	-73.9837	-87.1097	0.0641				10	-67.2809	-80.4069	0.0965				10	-61.2404	-74.3664	0.0464				10	-54.9749	-68.1009	-0.0187
	12	-79.6682	-92.7942	0.1021				12	-73.7947	-86.9207	0.2531				12	-67.263	-80.389	0.1144				12	-61.1803	-74.3063	0.1065				12	-55.0781	-68.2041	-0.1219
	14	-79.4528	-92.5788	0.3175				14	-73.6892	-86.8152	0.3586				14	-67.0955	-80.2215	0.2819				14	-60.9726	-74.0986	0.3142				14	-55.0989	-68.2249	-0.1427
	16	-79.3414	-92.4674	0.4289				16	-73.3873	-86.5133	0.6605				16	-66.8266	-79.9526	0.5508				16	-60.8116	-73.9376	0.4752				16	-54.8822	-68.0082	0.074
	18	-78.9443	-92.0703	0.826				18	-72.8313	-85.9573	1.2165				18	-66.5384	-79.6644	0.839				18	-60.6195	-73.7455	0.6673				18	-54.2224	-67.3484	0.7338
	20	-78.3174	-91.4434	1.4529				20	-72.3093	-85.4353	1.7385				20	-65.6157	-78.7417	1.7617				20	-59.731	-72.857	1.5558				20	-53.5661	-66.6921	1.3901
Matching Intermediate (Rh10O5-CO)	int_guess	-94.5085	-94.5085	-1.6122			Matching Intermediate (Rh10O4-CO)	int_guess	-88.8273	-88.8273	-1.6535			Matching Intermediate (Rh10O3-CO)	int_guess	-82.1729	-82.1729	-1.6695			Matching Intermediate (Rh10O2-CO)	Kick0104	-76.3469	-76.3469	-1.9341			Matching Intermediate (Rh10O-CO)	Kick0306	-68.1354	-68.1354	-0.0532
	2	-94.3963	-94.3963	-1.5				2	-88.8111	-88.8111	-1.6373				2	-82.3112	-82.3112	-1.8078				2							2	-67.9057	-67.9057	0.1765
	4							4	-88.8593	-88.8593	-1.6855				4	-82.276	-82.276	-1.7726				4	-76.3893	-76.3893	-1.9765				4
	6	-94.5133	-94.5133	-1.617				6	-88.922	-88.922	-1.7482				6	-82.2238	-82.2238	-1.7204				6	-76.3597	-76.3597	-1.9469				6	-68.1068	-68.1068	-0.0246
	8	-94.5086	-94.5086	-1.6123				8	-88.8258	-88.8258	-1.652				8	-82.1724	-82.1724	-1.669				8	-76.3467	-76.3467	-1.9339				8	-68.1356	-68.1356	-0.0534
	10	-94.4668	-94.4668	-1.5705				10	-88.7782	-88.7782	-1.6044				10	-82.1609	-82.1609	-1.6575				10	-76.3291	-76.3291	-1.9163				10	-68.1379	-68.1379	-0.0557
	12	-94.4548	-94.4548	-1.5585				12	-88.6095	-88.6095	-1.4357				12	-82.0376	-82.0376	-1.5342				12	-76.1071	-76.1071	-1.6943				12	-68.2529	-68.2529	-0.1707
	14	-94.2234	-94.2234	-1.3271				14	-88.4019	-88.4019	-1.2281				14	-81.8857	-81.8857	-1.3823				14	-75.894	-75.894	-1.4812				14	-68.2772	-68.2772	-0.195
	16	-93.892	-93.892	-0.9957				16	-87.9505	-87.9505	-0.7767				16	-81.5333	-81.5333	-1.0299				16	-75.6503	-75.6503	-1.2375				16	-68.0823	-68.0823	-0.0001
	18	-93.3978	-93.3978	-0.5015				18	-87.4496	-87.4496	-0.2758				18	-80.9768	-80.9768	-0.4734				18	-75.0596	-75.0596	-0.6468				18	-67.4174	-67.4174	0.6648
	20	-92.5058	-92.5058	0.3905				20	-86.4263	-86.4263	0.7475				20	-80.0748	-80.0748	0.4286				20	-74.147	-74.147	0.2658				20	-66.7547	-66.7547	1.3275
Matching Rh10O4 + CO2	Kick0514	-73.0494	-92.859	0.0373			Matching Rh10O3 + CO2	Kick0826	-67.305	-87.1146	0.0592			Matching Rh10O2 + CO2	Kick0133	-60.8478	-80.6574	-0.154			Matching Rh10O + CO2	Kick0205	-54.9562	-74.7658	-0.353			Matching Rh10 + CO2		-48.1261	-67.9357	0.1465
	2							2							2	-60.8667	-80.6763	-0.1729				2	-54.7426	-74.5522	-0.1394				2	-48.0172	-67.8268	0.2554
	4							4	-67.2547	-87.0643	0.1095				4	-60.8602	-80.6698	-0.1664				4	-54.9097	-74.7193	-0.3065				4	-48.0101	-67.8197	0.2625
	6	-73.2714	-93.081	-0.1847				6	-67.2906	-87.1002	0.0736				6	-60.8071	-80.6167	-0.1133				6	-54.9423	-74.7519	-0.3391				6	-48.0436	-67.8532	0.229
	8							8	-67.305	-87.1146	0.0592				8	-60.8478	-80.6574	-0.154				8	-54.9563	-74.7659	-0.3531				8	-48.1121	-67.9217	0.1605
	10	-73.016	-92.8256	0.0707				10	-67.3016	-87.1112	0.0626				10	-60.8247	-80.6343	-0.1309				10	-54.9749	-74.7845	-0.3717				10	-48.2792	-68.0888	-0.0066
	12							12	-67.2434	-87.053	0.1208				12	-60.8737	-80.6833	-0.1799				12	-55.0781	-74.8877	-0.4749				12	-48.4672	-68.2768	-0.1946
	14	-72.6349	-92.4445	0.4518				14	-67.1052	-86.9148	0.259				14	-60.8389	-80.6485	-0.1451				14	-55.0989	-74.9085	-0.4957				14	-48.5151	-68.3247	-0.2425
	16	-72.4573	-92.2669	0.6294				16	-66.9113	-86.7209	0.4529				16	-60.6544	-80.464	0.0394				16	-54.8822	-74.6918	-0.279				16	-48.7213	-68.5309	-0.4487
	18	-72.2289	-92.0385	0.8578				18	-66.4348	-86.2444	0.9294				18	-60.1744	-79.984	0.5194				18	-54.2223	-74.0319	0.3809				18	-48.4022	-68.2118	-0.1296
	20	-71.8335	-91.6431	1.2532				20	-65.8927	-85.7023	1.4715				20	-59.3429	-79.1525	1.3509				20	-53.5661	-73.3757	1.0371				20	-47.3361	-67.1457	0.9365
Matching Rh10O5 + CO	reactant_guess	-79.6146	-92.7406	0.1557			Matching Rh10O4 + CO	Kick0743	-72.8019	-85.9279	1.2459			Matching Rh10O3 + CO	Kick0549	-67.3774	-80.5034	0			Matching Rh10O2 + CO	Kick0471	-60.8413	-73.9673	0.4455
	2	-79.7871	-92.9131	-0.0168				2							2	-67.5056	-80.6316	-0.1282				2
	4	-79.7986	-92.9246	-0.0283				4							4	-67.4463	-80.5723	-0.0689				4	-60.8642	-73.9902	0.4226
	6							6							6	-67.4391	-80.5651	-0.0617				6	-60.8066	-73.9326	0.4802
	8	-79.6147	-92.7407	0.1556				8	-72.8022	-85.9282	1.2456				8	-67.3767	-80.5027	0.0007				8	-60.8413	-73.9673	0.4455
	10	-79.4676	-92.5936	0.3027				10	-72.7169	-85.8429	1.3309				10	-67.281	-80.407	0.0964				10	-60.8055	-73.9315	0.4813
	12		-13.126					12	-72.6964	-85.8224	1.3514				12	-67.263	-80.389	0.1144				12	-60.8572	-73.9832	0.4296
	14	-79.057	-92.183	0.7133				14	-72.5367	-85.6627	1.5111				14	-67.0951	-80.2211	0.2823				14	-60.8258	-73.9518	0.461
	16	-78.7802	-91.9062	0.9901				16	-72.2039	-85.3299	1.8439				16	-66.8264	-79.9524	0.551				16	-60.6436	-73.7696	0.6432
	18	-78.2754	-91.4014	1.4949				18	-71.9288	-85.0548	2.119				18	-66.5384	-79.6644	0.839				18	-60.1606	-73.2866	1.1262
	20	-77.6934	-90.8194	2.0769				20	-71.4061	-84.5321	2.6417				20	-65.6157	-78.7417	1.7617				20	-59.3288	-72.4548	1.958
Matching Intermediate (Rh10O5-CO)	int_guess_2	-94.6485	-94.6485	-1.7522			Matching Intermediate (Rh10O4-CO)	int_guess	-88.0669	-88.0669	-0.8931			Matching Intermediate (Rh10O3-CO)	int_guess_2	-81.8725	-81.8725	-1.3691			Matching Intermediate (Rh10O2-CO)	Kick0174	-76.0938	-76.0938	-1.681
	2							2	-87.9578	-87.9578	-0.784				2	-81.9753	-81.9753	-1.4719				2	-75.9478	-75.9478	-1.535
	4	-94.7021	-94.7021	-1.8058				4	-88.0409	-88.0409	-0.8671				4	-81.9291	-81.9291	-1.4257				4	-76.0152	-76.0152	-1.6024
	6	-94.7019	-94.7019	-1.8056				6	-88.1462	-88.1462	-0.9724				6	-81.9033	-81.9033	-1.3999				6	-76.0698	-76.0698	-1.657
	8	-94.6485	-94.6485	-1.7522				8	-88.0669	-88.0669	-0.8931				8	-81.8716	-81.8716	-1.3682				8	-76.0938	-76.0938	-1.681
	10	-94.475	-94.475	-1.5787				10	-87.8663	-87.8663	-0.6925				10	-81.7371	-81.7371	-1.2337				10	-75.9902	-75.9902	-1.5774
	12	-94.2803	-94.2803	-1.384				12	-87.6096	-87.6096	-0.4358				12	-81.5355	-81.5355	-1.0321				12	-75.9219	-75.9219	-1.5091
	14	-94.0523	-94.0523	-1.156				14	-87.4085	-87.4085	-0.2347				14	-81.321	-81.321	-0.8176				14	-75.8392	-75.8392	-1.4264
	16	-93.6961	-93.6961	-0.7998				16	-87.1547	-87.1547	0.0191				16	-81.0437	-81.0437	-0.5403				16	-75.746	-75.746	-1.3332
	18	-93.2418	-93.2418	-0.3455				18	-86.8196	-86.8196	0.3542				18	-80.1823	-80.1823	0.3211				18	-74.9253	-74.9253	-0.5125
	20	-92.6481	-92.6481	0.2482				20	-86.0358	-86.0358	1.138				20	-79.3589	-79.3589	1.1445				20	-74.1319	-74.1319	0.2809
LE Rh10O4 + CO2	Kick0609	-74.0478	-93.8574	-0.9611			LE Rh10O3 + CO2	Kick0549	-67.3774	-87.187	-0.0132			LE Rh10O2 + CO2	Kick0680	-61.2868	-81.0964	-0.593			LE Rh10O + CO2	Kick0205	-54.9562	-74.7658	-0.353
	2	-74.1082	-93.9178	-1.0215				2	-67.5056	-87.3152	-0.1414				2	-61.6772	-81.4868	-0.9834				2
	4	-74.1261	-93.9357	-1.0394				4	-67.4182	-87.2278	-0.054				4	-61.5382	-81.3478	-0.8444				4	-54.9043	-74.7139	-0.3011
	6							6	-67.4392	-87.2488	-0.075				6	-61.3915	-81.2011	-0.6977				6	-54.942	-74.7516	-0.3388
	8	-74.0479	-93.8575	-0.9612				8	-67.3771	-87.1867	-0.0129				8	-61.2867	-81.0963	-0.5929				8	-54.9562	-74.7658	-0.353
	10	-73.9836	-93.7932	-0.8969				10	-67.2808	-87.0904	0.0834				10	-61.2404	-81.05	-0.5466				10	-54.9749	-74.7845	-0.3717
	12	-73.7946	-93.6042	-0.7079				12	-67.263	-87.0726	0.1012				12	-61.1803	-80.9899	-0.4865				12	-55.0781	-74.8877	-0.4749
	14	-73.6892	-93.4988	-0.6025				14	-67.0954	-86.905	0.2688				14	-60.9726	-80.7822	-0.2788				14	-55.0989	-74.9085	-0.4957
	16	-73.3873	-93.1969	-0.3006				16	-66.8264	-86.636	0.5378				16	-60.8118	-80.6214	-0.118				16	-54.8822	-74.6918	-0.279
	18	-72.8313	-92.6409	0.2554				18	-66.5385	-86.3481	0.8257				18	-60.6194	-80.429	0.0744				18	-54.2224	-74.032	0.3808
	20	-72.3093	-92.1189	0.7774				20	-65.6157	-85.4253	1.7485				20	-59.731	-79.5406	0.9628				20	-53.5661	-73.3757	1.0371

## Sheet: N2O to N2 BP86
N2O to N2
Rh to Rh10O							Rh10O to Rh10O2							Rh10O2 to Rh10O3							Rh10O3 to Rh10O4							Rh10O4 to Rh10O5
				dEV							dEV							dEV							dEV							dEV
Matching Rh10 + N2O		-48.1261	-66.0966	0			LE Rh10O + N2O	Kick0205	-54.9562	-72.9267	0			LE Rh10O2 + N2O	Kick0680	-61.2868	-79.2573	0			LE Rh10O3 + N2O	Kick0549	-67.3774	-85.3479	0			LE Rh10O4 + N2O	Kick0609	-74.0478	-92.0183	0
Matching Intermediate (Rh10O-N2)	Kick0124	-70.6318	-70.6318	-4.5352			Matching Intermediate (Rh10O2-N2)	int_guess	-76.7661	-76.7661	-3.8394			Matching Intermediate (Rh10O3-N2)	int_guess	-83.0833	-83.0833	-3.826			Matching Intermediate (Rh10O4-N2)	int_guess	-88.5751	-88.5751	-3.2272			Matching Intermediate (Rh10O5-N2)	int_guess_2	-94.4935	-94.4935	-2.4752
LE Rh10O + N2	Kick0205	-54.9562	-69.6633	-3.5667			Matching Rh10O2 + N2	Kick0471	-60.8413	-75.5484	-2.6217			Matching Rh10O3 + N2	Kick0549	-67.3774	-82.0845	-2.8272			Matching Rh10O4 + N2	Kick0743	-72.8019	-87.509	-2.1611			Matching Rh10O5 + N2	product_guess	-79.7214	-94.4285	-2.4102
							Matching Rh10O + N2O	Kick0205	-54.9562	-72.9267	0			Matching Rh10O2 + N2O	Kick0133	-60.8478	-78.8183	0.439			Matching Rh10O3 + N2O	Kick0826	-67.305	-85.2755	0.0724			Matching Rh10O4 + N2O	Kick0514	-73.0494	-91.0199	0.9984
							Matching Intermediate (Rh10O2-N2) *180 deg rotate	Kick0026	-76.1889	-76.1889	-3.2622			Matching Intermediate (Rh10O3-N2)	int_guess	-82.7962	-82.7962	-3.5389			Matching Intermediate (Rh10O4-N2)	int_guess	-89.6804	-89.6804	-4.3325			Matching Intermediate (Rh10O5-N2)	int_guess	-95.7688	-95.7688	-3.7505
							LE Rh10O2 + N2	Kick0680	-61.2868	-75.9939	-3.0672			LE Rh10O3 + N2	Kick0549	-67.3774	-82.0845	-2.8272			LE Rh10O4 + N2	Kick0609	-74.0478	-88.7549	-3.407			LE Rh10O5 + N2	Kick0757	-79.7703	-94.4774	-2.4591
N2	-14.7071
N2O	-17.9705
octet
N2O to N2
Rh to Rh10O							Rh10O to Rh10O2							Rh10O2 to Rh10O3							Rh10O3 to Rh10O4							Rh10O4 to Rh10O5
				dEV							dEV							dEV							dEV							dEV
Matching Rh10 + N2O		-48.1261	-66.0966	3.5667			LE Rh10O + N2O	Kick0205	-54.9562	-72.9267	0			LE Rh10O2 + N2O	Kick0680	-61.2868	-79.2573	0			LE Rh10O3 + N2O	Kick0549	-67.3774	-85.3479	0			LE Rh10O4 + N2O	Kick0609	-74.0478	-92.0183	0
	2	-48.0172	-65.9877	3.6756				2	-54.7427	-72.7132	0.2135				2	-61.6772	-79.6477	-0.3904				2	-67.5056	-85.4761	-0.1282				2	-74.1082	-92.0787	-0.0604
	4	-48.0101	-65.9806	3.6827				4	-54.9097	-72.8802	0.0465				4	-61.3915	-79.362	-0.1047				4							4	-74.1261	-92.0966	-0.0783
	6	-48.0436	-66.0141	3.6492				6	-54.9423	-72.9128	0.0139				6	-61.2867	-79.2572	0.0001				6	-67.4392	-85.4097	-0.0618				6			92.0183
	8	-48.1121	-66.0826	3.5807				8	-54.9563	-72.9268	-0.0001				8							8	-67.3767	-85.3472	0.0007				8	-74.0479	-92.0184	-0.0001
	10	-48.2792	-66.2497	3.4136				10	-54.9749	-72.9454	-0.0187				10	-61.2404	-79.2109	0.0464				10	-67.2809	-85.2514	0.0965				10	-73.9837	-91.9542	0.0641
	12	-48.4672	-66.4377	3.2256				12	-55.0781	-73.0486	-0.1219				12	-61.1803	-79.1508	0.1065				12	-67.263	-85.2335	0.1144				12	-73.7946	-91.7651	0.2532
	14	-48.5151	-66.4856	3.1777				14	-55.0989	-73.0694	-0.1427				14	-60.9726	-78.9431	0.3142				14	-67.0954	-85.0659	0.282				14	-73.6892	-91.6597	0.3586
	16	-48.7213	-66.6918	2.9715				16	-54.8822	-72.8527	0.074				16	-60.8118	-78.7823	0.475				16	-66.8264	-84.7969	0.551				16	-73.3873	-91.3578	0.6605
	18	-48.4022	-66.3727	3.2906				18	-54.2224	-72.1929	0.7338				18	-60.6195	-78.59	0.6673				18	-66.5385	-84.509	0.8389				18	-72.8313	-90.8018	1.2165
	20	-47.3361	-65.3066	4.3567				20	-53.5661	-71.5366	1.3901				20	-59.731	-77.7015	1.5558				20	-65.6157	-83.5862	1.7617				20	-72.3093	-90.2798	1.7385
Matching Intermediate (Rh10O-N2)	Kick0124	-70.6318	-70.6318	-0.9685			Matching Intermediate (Rh10O2-N2)	int_guess	-76.7661	-76.7661	-3.8394			Matching Intermediate (Rh10O3-N2)	int_guess	-83.0833	-83.0833	-3.826			Matching Intermediate (Rh10O4-N2)	int_guess	-88.5751	-88.5751	-3.2272			Matching Intermediate (Rh10O5-N2)	int_guess_2	-94.4935	-94.4935	-2.4752
	2	-70.3446	-70.3446	-0.6813				2	-76.5484	-76.5484	-3.6217				2	-83.2438	-83.2438	-3.9865				2	-88.6349	-88.6349	-3.287				2
	4	-70.4221	-70.4221	-0.7588				4	-76.6624	-76.6624	-3.7357				4	-83.1637	-83.1637	-3.9064				4	-88.6532	-88.6532	-3.3053				4	-94.581	-94.581	-2.5627
	6	-70.6346	-70.6346	-0.9713				6	-76.672	-76.672	-3.7453				6	-83.0618	-83.0618	-3.8045				6	-88.6498	-88.6498	-3.3019				6	-94.5326	-94.5326	-2.5143
	8	-70.6315	-70.6315	-0.9682				8	-76.7668	-76.7668	-3.8401				8	-83.0833	-83.0833	-3.826				8	-88.5751	-88.5751	-3.2272				8	-95.2817	-95.2817	-3.2634
	10	-70.6491	-70.6491	-0.9858				10	-76.7088	-76.7088	-3.7821				10	-82.9872	-82.9872	-3.7299				10	-88.3707	-88.3707	-3.0228				10	-95.0614	-95.0614	-3.0431
	12	-70.6567	-70.6567	-0.9934				12	-76.7613	-76.7613	-3.8346				12	-82.9686	-82.9686	-3.7113				12	-88.2376	-88.2376	-2.8897				12
	14	-70.6948	-70.6948	-1.0315				14	-76.6429	-76.6429	-3.7162				14	-82.8197	-82.8197	-3.5624				14	-88.132	-88.132	-2.7841				14	-93.9247	-93.9247	-1.9064
	16	-70.0558	-70.0558	-0.3925				16	-76.4695	-76.4695	-3.5428				16	-82.6086	-82.6086	-3.3513				16	-87.8002	-87.8002	-2.4523				16
	18	-69.368	-69.368	0.2953				18	-75.9054	-75.9054	-2.9787				18	-82.3696	-82.3696	-3.1123				18	-87.3451	-87.3451	-1.9972				18	-93.0756	-93.0756	-1.0573
	20	-68.53	-68.53	1.1333				20	-74.9943	-74.9943	-2.0676				20	-81.3905	-81.3905	-2.1332				20	-86.7358	-86.7358	-1.3879				20	-92.6444	-92.6444	-0.6261
LE Rh10O + N2	Kick0205	-54.9562	-69.6633	0			Matching Rh10O2 + N2	Kick0471	-60.8413	-75.5484	-2.6217			Matching Rh10O3 + N2	Kick0549	-67.3774	-82.0845	-2.8272			Matching Rh10O4 + N2	Kick0743	-72.8019	-87.509	-2.1611			Matching Rh10O5 + N2	product_guess	-79.7214	-94.4285	-2.4102
	2	-54.7448	-69.4519	0.2114				2							2	-67.5056	-82.2127	-2.9554				2	-72.7536	-87.4607	-2.1128				2
	4	-54.9041	-69.6112	0.0521				4	-60.8642	-75.5713	-2.6446				4		-14.7071					4	-72.8049	-87.512	-2.1641				4	-79.8083	-94.5154	-2.4971
	6	-54.9421	-69.6492	0.0141				6	-60.8067	-75.5138	-2.5871				6		-14.7071					6	-72.8717	-87.5788	-2.2309				6
	8	-54.9563	-69.6634	-0.0001				8	-60.8413	-75.5484	-2.6217				8	-67.3767	-82.0838	-2.8265				8	-72.8022	-87.5093	-2.1614				8	-79.7213	-94.4284	-2.4101
	10	-54.9749	-69.682	-0.0187				10	-60.8055	-75.5126	-2.5859				10	-67.2808	-81.9879	-2.7306				10	-72.717	-87.4241	-2.0762				10	-79.5049	-94.212	-2.1937
	12	-55.0781	-69.7852	-0.1219				12	-60.8572	-75.5643	-2.6376				12	-67.263	-81.9701	-2.7128				12	-72.6964	-87.4035	-2.0556				12	-79.3576	-94.0647	-2.0464
	14	-55.0989	-69.806	-0.1427				14	-60.8258	-75.5329	-2.6062				14	-67.0954	-81.8025	-2.5452				14	-72.5367	-87.2438	-1.8959				14
	16	-54.8822	-69.5893	0.074				16	-60.6436	-75.3507	-2.424				16	-66.8266	-81.5337	-2.2764				16	-72.2035	-86.9106	-1.5627				16	-78.7718	-93.4789	-1.4606
	18	-54.2224	-68.9295	0.7338				18	-60.1605	-74.8676	-1.9409				18	-66.5385	-81.2456	-1.9883				18	-71.9288	-86.6359	-1.288				18	-78.288	-92.9951	-0.9768
	20	-53.5661	-68.2732	1.3901				20	-59.3288	-74.0359	-1.1092				20	-65.6157	-80.3228	-1.0655				20	-71.4061	-86.1132	-0.7653				20	-77.7849	-92.492	-0.4737
							Matching Rh10O + N2O	Kick0205	-54.9562	-72.9267	0			Matching Rh10O2 + N2O	Kick0133	-60.8478	-78.8183	0.439			Matching Rh10O3 + N2O	Kick0826	-67.305	-85.2755	0.0724			Matching Rh10O4 + N2O	Kick0514	-73.0494	-91.0199	0.9984
								2	-54.7427	-72.7132	0.2135				2	-60.8916	-78.8621	0.3952				2	-67.2586	-85.2291	0.1188				2
								4	-54.9097	-72.8802	0.0465				4	-60.8602	-78.8307	0.4266				4	-67.2547	-85.2252	0.1227				4
								6	-54.9423	-72.9128	0.0139				6	-60.8071	-78.7776	0.4797				6	-67.2905	-85.261	0.0869				6	-73.2714	-91.2419	0.7764
								8	-54.9563	-72.9268	-0.0001				8	-60.8478	-78.8183	0.439				8	-67.305	-85.2755	0.0724				8	-73.08	-91.0505	0.9678
								10	-54.9749	-72.9454	-0.0187				10	-60.8247	-78.7952	0.4621				10	-67.3016	-85.2721	0.0758				10	-73.016	-90.9865	1.0318
								12	-55.0781	-73.0486	-0.1219				12	-60.8738	-78.8443	0.413				12	-67.2433	-85.2138	0.1341				12
								14	-55.0989	-73.0694	-0.1427				14	-60.839	-78.8095	0.4478				14	-67.1053	-85.0758	0.2721				14	-72.6349	-90.6054	1.4129
								16	-54.8822	-72.8527	0.074				16	-60.6544	-78.6249	0.6324				16	-66.9108	-84.8813	0.4666				16	-72.4573	-90.4278	1.5905
								18	-54.2224	-72.1929	0.7338				18	-60.1742	-78.1447	1.1126				18	-66.4348	-84.4053	0.9426				18	-72.2289	-90.1994	1.8189
								20	-53.5661	-71.5366	1.3901				20	-59.3429	-77.3134	1.9439				20	-65.8927	-83.8632	1.4847				20	-71.8335	-89.804	2.2143
							Matching Intermediate (Rh10O2-N2) *180 deg rotate	Kick0026	-76.1889	-76.1889	-3.2622			Matching Intermediate (Rh10O3-N2)	int_guess	-82.7962	-82.7962	-3.5389			Matching Intermediate (Rh10O4-N2)	int_guess	-89.6804	-89.6804	-4.3325			Matching Intermediate (Rh10O5-N2)	int_guess	-95.7688	-95.7688	-3.7505
								2							2							2	-89.761	-89.761	-4.4131				2	-95.7224	-95.7224	-3.7041
								4	-76.4007	-76.4007	-3.474				4	-82.7545	-82.7545	-3.3925				4	-89.7661	-89.7661	-4.4182				4	-95.8801	-95.8801	-3.8618
								6							6	-82.7737	-82.7737	-3.5165				6	-89.7496	-89.7496	-4.4017				6	-95.8569	-95.8569	-3.8386
								8	-76.1886	-76.1886	-3.2619				8	-82.7961						8	-89.6804	-89.6804	-4.3325				8	-95.7688	-95.7688	-3.7505
								10	-76.1262	-76.1262	-3.1995				10	-82.7105	-82.7105	-3.4996				10	-89.6483	-89.6483	-4.3004				10	-95.6284	-95.6284	-3.6101
								12	-76.0105	-76.0105	-3.0838				12	-82.6164	-82.6164	-3.4656				12							12	-95.5186	-95.5186	-3.5003
								14							14	-82.4492	-82.4492	-3.5061				14	-89.1116	-89.1116	-3.7637				14	-95.3121	-95.3121	-3.2938
								16							16	-82.2265	-82.2265	-3.4442				16	-88.6957	-88.6957	-3.3478				16	-95.0155	-95.0155	-2.9972
								18	-75.5754	-75.5754	-2.6487				18	-81.6062	-81.6062	-3.0162				18	-88.1236	-88.1236	-2.7757				18	-94.6084	-94.6084	-2.5901
								20	-74.7738	-74.7738	-1.8471				20	-80.6561	-80.6561	-2.9546				20	-87.6097	-87.6097	-2.2618				20	-94.1127	-94.1127	-2.0944
							LE Rh10O2 + N2	Kick0680	-61.2868	-75.9939	-3.0672			LE Rh10O3 + N2	Kick0549	-67.3774	-82.0845	-2.8272			LE Rh10O4 + N2	Kick0609	-74.0478	-88.7549	-3.407			LE Rh10O5 + N2	Kick0757	-79.7703	-94.4774	-2.4591
								2	-61.6772	-76.3843	-3.4576				2	-67.5056	-82.2127	-2.565				2	-74.1082	-88.8153	-3.3392				2
								4	-61.5382	-76.2453	-3.3186				4	-67.4388	-82.1459	-2.7839				4							4
								6							6	-67.4391	-82.1462	-2.889				6	-74.1512	-88.8583	-3.4486				6	-79.7142	-94.4213	-2.403
								8	-61.2867	-75.9938	-3.0671				8	-67.3772	-82.0843	-82.0843				8	-74.0479	-88.755	-3.4078				8	-79.7703	-94.4774	-2.4591
								10	-61.2404	-75.9475	-3.0208				10	-67.2809	-81.988	-2.7771				10	-73.9837	-88.6908	-3.4394				10	-79.7104	-94.4175	-2.3992
								12	-61.1802	-75.8873	-2.9606				12	-67.263	-81.9701	-2.8193				12	-73.7947	-88.5018	-3.2683				12	-79.668	-94.3751	-2.3568
								14	-60.9726	-75.6797	-2.753				14	-67.0954	-81.8025	-2.8594				14	-73.6892	-88.3963	-3.3304				14	-79.4527	-94.1598	-2.1415
								16	-60.8126	-75.5197	-2.593				16	-66.8264	-81.5335	-2.7512				16	-73.3873	-88.0944	-3.2975				16	-79.3414	-94.0485	-2.0302
								18	-60.6195	-75.3266	-2.3999				18	-66.5384	-81.2455	-2.6555				18	-72.8313	-87.5384	-3.0294				18	-78.9443	-93.6514	-1.6331
								20	-59.731	-74.4381	-1.5114				20	-65.6157	-80.3228	-2.6213				20	-72.3093	-87.0164	-3.4302				20	-78.3174	-93.0245	-1.0062

## Sheet: Diff CO to CO2
CO to CO2
Rh10O5 to Rh10O4							Rh10O4 to Rh10O3							Rh10O3 to Rh10O2							Rh10O2 to Rh10O							Rh10O to Rh10
				dEV							dEV							dEV							dEV
LE Rh10O5 + CO	Kick0757			0			LE Rh10O4 + CO	Kick0609			0			LE Rh10O3 + CO	Kick0549			0			LE Rh10O2 + CO	Kick0680			0			LE Rh10O + CO	Kick0205			0
Matching Intermediate (Rh10O5-CO)	int_guess			0.359153			Matching Intermediate (Rh10O4-CO)	int_guess			0.4135			Matching Intermediate (Rh10O3-CO)	int_guess			0.3093			Matching Intermediate (Rh10O2-CO)	Kick0104			0.3799			Matching Intermediate (Rh10O-CO)	Kick0306			0.0678077
Matching Rh10O4 + CO2	Kick0514			-0.5419			Matching Rh10O3 + CO2	Kick0826			-0.5014			Matching Rh10O2 + CO2	Kick0133			-0.4089			Matching Rh10O + CO2	Kick0205			-0.3739			Matching Rh10 + CO2				-0.459
Matching Rh10O5 + CO	reactant_guess			0.0064			Matching Rh10O4 + CO	Kick0743			-0.0527			Matching Rh10O3 + CO	Kick0549			0			Matching Rh10O2 + CO	Kick0471			0.0466
Matching Intermediate (Rh10O5-CO)	int_guess_2			0.022			Matching Intermediate (Rh10O4-CO)	int_guess			0.2567			Matching Intermediate (Rh10O3-CO)	int_guess_2			0.0954			Matching Intermediate (Rh10O2-CO)	Kick0174			0.4319
LE Rh10O4 + CO2	Kick0609			-0.378			LE Rh10O3 + CO2	Kick0549			-0.5484			LE Rh10O2 + CO2	Kick0680			-0.4543			LE Rh10O + CO2	Kick0205			-0.3739
CO
CO2
octet
CO to CO2
Rh10O5 to Rh10O4							Rh10O4 to Rh10O3							Rh10O3 to Rh10O2							Rh10O2 to Rh10O							Rh10O to Rh10
				dEV							dEV							dEV							dEV
LE Rh10O5 + CO	Kick0757			0			LE Rh10O4 + CO	Kick0609			0			LE Rh10O3 + CO	Kick0549			0			LE Rh10O2 + CO	Kick0680			0			LE Rh10O + CO	Kick0205			0
	2			0				2			-0.0318				2			0.0522				2			-0.0153				2			-0.025
	4			0.0454				4			-0.0223				4			-0.0334				4			-0.0163				4			-0.1424
	6			0.0527				6			-0.0907				6			-0.0417				6			-0.0271				6			-0.0186
	8			0				8			-0.0001				8			0.0003				8			0.0001				8			-0.0001
	10			0.0249				10			0.0342				10			-0.019162				10			0.0205				10			-0.0162
	12			0.0821922				12			0.0148				12			-0.0266				12			0.0017				12			-0.0065
	14			0.0951				14			0.0155				14			-0.0138638				14			0.0210394				14			-0.0215
	16			0.0535				16			-0.018				16			-0.0426217				16			0.4752				16			-0.0433
Matching Intermediate (Rh10O5-CO)	int_guess			0.359153			Matching Intermediate (Rh10O4-CO)	int_guess			0.4135			Matching Intermediate (Rh10O3-CO)	int_guess			0.3093			Matching Intermediate (Rh10O2-CO)	Kick0104			0.3799			Matching Intermediate (Rh10O-CO)	Kick0306			0.0678077
	2			0.397804				2			0.4438				2			0.2453				2							2			0.0429296
	4			1.82687				4			0.4425				4			0.2546				4			0.4315				4			0.0205506
	6			0.3575				6			0.4477				6			0.2242				6			0.3274				6			0.0458
	8			0.359053				8			0.415				8			0.3098				8			0.3801				8			0.0676077
	10			0.418231				10			0.443				10			0.3312				10			0.351971				10			0.078
	12			0.415363				12			0.5022				12			0.3312				12			0.4032				12			0.053
	14			0.386284				14			0.480679				14			0.278467				14			0.3973				14			0.0569
	16			0.400949				16			0.4036				16			0.277156				16			0.3808				16			0.039
Matching Rh10O4 + CO2	Kick0514			-0.5419			Matching Rh10O3 + CO2	Kick0826			-0.5014			Matching Rh10O2 + CO2	Kick0133			-0.4089			Matching Rh10O + CO2	Kick0205			-0.3739			Matching Rh10 + CO2				-0.459
	2			0				2							2							2			-0.3959				2			-0.504
	4			0				4			-0.53304				4							4			-0.5218				4			-0.394
	6			-0.974297				6			-0.5037				6			-0.3589				6			-0.3885				6			-0.3965
	8			-0.5792				8			-0.5014				8			-0.4089				8			-0.374				8			-0.445
	10			-0.5142				10			-0.486				10			-0.3522				10			-0.3901				10			-0.4605
	12			-0.808326				12			-0.5031				12			-0.3855				12			-0.3804				12			-0.3906
	14			-0.5482				14			-0.4603				14			-0.3841				14			-0.3954				14			-0.432205
	16			-0.532048				16			-0.574578				16							16			-0.4172				16			-0.4341
Matching Rh10O5 + CO	reactant_guess			0.0064			Matching Rh10O4 + CO	Kick0743			-0.0527			Matching Rh10O3 + CO	Kick0549			0			Matching Rh10O2 + CO	Kick0471			0.0466
	2			-0.0524				2							2			-0.0295				2			0
	4			-0.0845				4			-1.2652				4			-0.0411				4			-0.0315
	6			-0.0574				6			-1.216				6			-0.0416				6			0.0899
	8			0.0063				8			-0.053				8			0.0007				8			0.0466
	10			-0.00215377				10			0.014				10			-0.019262				10			0.0894783
	12			-0.5106				12			-0.0184				12			-0.0266				12			0.0638
	14			-0.0977282				14			0.0156				14			-0.0134638				14			0.0654
	16							16			-0.0433				16			-0.0424217				16			0.0310789
Matching Intermediate (Rh10O5-CO)	int_guess_2			0.022			Matching Intermediate (Rh10O4-CO)	int_guess			0.2567			Matching Intermediate (Rh10O3-CO)	int_guess_2			0.0954			Matching Intermediate (Rh10O2-CO)	Kick0174			0.4319
	2							2			0.2997				2			-1.4719				2
	4			0.0813				4							4			0.0453				4			0.4614
	6			0.0091				6			0.2104				6			0.1355				6			0.4574
	8			0.022				8			0.2567				8			0.0963				8			0.4319
	10			0.0704				10			0.2774				10			0.112725				10			0.4344
	12			0.0435				12			0.341714				12			0.139416				12			0.4755
	14							14			0.3245				14			0.1399				14			0.461512
	16							16			0.3717				16			0.125644				16			0.370287
LE Rh10O4 + CO2	Kick0609			-0.378			LE Rh10O3 + CO2	Kick0549			-0.5484			LE Rh10O2 + CO2	Kick0680			-0.4543			LE Rh10O + CO2	Kick0205			-0.3739
	2			-1.0215				2			-0.5779				2			-0.4697				2			-0.2565
	4			-0.4024				4			-0.5614				4			-0.4737				4			-0.5164
	6			0.5956				6			-0.5892				6			-0.4803				6			-0.3882
	8			-0.3781				8			-0.5481				8			-0.4542				8			-0.3739
	10			-0.3427				10			-0.567462				10			-0.4349				10			-0.3901
	12			-0.3632				12			-0.575				12			-0.454				12			-0.3804
	14			-0.3645				14			-0.562164				14			-0.4323				14			-0.3954
	16			-0.399				16			-0.590822				16			-0.490324				16			-0.4172

## Sheet: Diff N2O to N2
N2O to N2
Rh to Rh10O							Rh10O to Rh10O2							Rh10O2 to Rh10O3							Rh10O3 to Rh10O4							Rh10O4 to Rh10O5
				dEV							dEV							dEV							dEV							dEV
Matching Rh10 + N2O				0			LE Rh10O + N2O	Kick0205			0			LE Rh10O2 + N2O	Kick0680			0			LE Rh10O3 + N2O	Kick0549			0			LE Rh10O4 + N2O	Kick0609			0
Matching Intermediate (Rh10O-N2)	Kick0124			0.437517			Matching Intermediate (Rh10O2-N2)	int_guess			0.68298			Matching Intermediate (Rh10O3-N2)	int_guess			0.6043			Matching Intermediate (Rh10O4-N2)	int_guess			0.567191			Matching Intermediate (Rh10O5-N2)	int_guess_2			1.24884
LE Rh10O + N2	Kick0205			0.1422			Matching Rh10O2 + N2	Kick0471			0.3156			Matching Rh10O3 + N2	Kick0549			0.3952			Matching Rh10O4 + N2	Kick0743			0.545			Matching Rh10O5 + N2	product_guess			0.2322
							Matching Rh10O + N2O	Kick0205			-0.1129			Matching Rh10O2 + N2O	Kick0133			0.181571			Matching Rh10O3 + N2O	Kick0826			0.1986			Matching Rh10O4 + N2O	Kick0514			0.0691
							Matching Intermediate (Rh10O2-N2) *180 deg rotate	Kick0026			0.3866			Matching Intermediate (Rh10O3-N2)	int_guess			0.7535			Matching Intermediate (Rh10O4-N2)	int_guess			1.0319			Matching Intermediate (Rh10O5-N2)	int_guess			0.818209
							LE Rh10O2 + N2	Kick0680			0.2109			LE Rh10O3 + N2	Kick0549			0.4204			LE Rh10O4 + N2	Kick0609			0.6381			LE Rh10O5 + N2	Kick0757			0.5579
N2
N2O
octet
N2O to N2
Rh to Rh10O							Rh10O to Rh10O2							Rh10O2 to Rh10O3							Rh10O3 to Rh10O4							Rh10O4 to Rh10O5
				dEV							dEV							dEV							dEV							dEV
Matching Rh10 + N2O							LE Rh10O + N2O	Kick0205						LE Rh10O2 + N2O	Kick0680						LE Rh10O3 + N2O	Kick0549						LE Rh10O4 + N2O	Kick0609
	2			-0.4813				2			-0.0224				2			-0.017				2			-0.0299				2			-0.0604
	4			-0.3713				4			-0.1479				4			0.1256				4			0.0269				4			-0.0224064
	6			-0.3738				6			-0.019				6			0.0778				6			-0.0406				6
	8			-0.4223				8			-0.0001				8			0				8			0.0007				8			-0.0001
	10			-0.4378				10			-0.0162				10			0.0187				10			-0.0194				10			0.0332
	12			-0.3679				12			-0.0065				12			0.001				12			-0.0267				12			0.0145
	14			-0.409505				14			-0.0215				14			0.0199				14			-0.0145				14			0.0141
	16			-0.4114				16			-0.0433				16			0.475				16			-0.0424167				16			-0.0192
Matching Intermediate (Rh10O-N2)	Kick0124						Matching Intermediate (Rh10O2-N2)	int_guess						Matching Intermediate (Rh10O3-N2)	int_guess						Matching Intermediate (Rh10O4-N2)	int_guess						Matching Intermediate (Rh10O5-N2)	int_guess_2
	2			-0.6813				2			-3.6217				2			0.5961				2							2
	4			0.4472				4			0.7511				4			0.683934				4			0.68				4			1.526
	6			0.3632				6			0.8151				6			0.7052				6			0.6873				6			1.5239
	8			0.3829				8			0.7866				8			0.712614				8			0.73				8			0.6812
	10			0.373642				10			0.8353				10			0.6725				10			0.739287				10			0.754503
	12			0.385817				12			0.80318				12			0.6135				12			0.763591				12
	14			0.3579				14			0.800821				14			0.7002				14			0.736404				14			1.22655
	16			0.354118				16			0.894462				16			0.775224				16			0.794514				16
LE Rh10O + N2	Kick0205						Matching Rh10O2 + N2	Kick0471						Matching Rh10O3 + N2	Kick0549						Matching Rh10O4 + N2	Kick0743						Matching Rh10O5 + N2	product_guess
	2			-0.0245				2			0				2			0.4009				2							2
	4			-0.1423				4			0.322027				4			3.2849				4			0.5031				4			0.3888
	6			-0.0188				6			0.4428				6			3.2792				6			0.4855				6
	8			-0.0001				8			0.3978				8			0.4315				8			0.4728				8			0.3398
	10			-0.0162				10			0.4398				10			0.4115				10			0.5382				10			0.3959
	12			-0.0065				12			0.4151				12			0.4041				12			0.5094				12			0.3573
	14			-0.0215				14			0.4173				14			0.4163				14			0.5408				14
	16			-0.0433				16			0.391833				16			0.388183				16			0.4872				16			0.313766
							Matching Rh10O + N2O	Kick0205						Matching Rh10O2 + N2O	Kick0133						Matching Rh10O3 + N2O	Kick0826						Matching Rh10O4 + N2O	Kick0514
								2			-0.0224				2			0.0498				2			0.0287				2			0
								4			-0.1474				4			0.4266				4			0.0103811				4			0
								6			-0.019				6			0.0957				6			0.0032				6			-0.596297
								8			-0.0001				8			0.0443				8			0.0472				8			-0.1945
								10			-0.0162				10			0.0991712				10			0.0609				10			-0.1362
								12			-0.0065				12			0.0693				12			0.0441				12
								14			-0.0215				14			0.0686237				14			0.0858469				14			-0.1702
								16			-0.0433				16			0.0434				16			-0.0248				16			-0.154048
							Matching Intermediate (Rh10O2-N2) *180 deg rotate	Kick0026						Matching Intermediate (Rh10O3-N2)	int_guess						Matching Intermediate (Rh10O4-N2)	int_guess						Matching Intermediate (Rh10O5-N2)	int_guess
								2			4.1131				2			4.1638				2			-4.4131				2			0.7937
								4			0.5098				4			0.7957				4			0.8979				4			-3.8618
								6			3.8921				6			0.6862				6			0.8752				6			0.6486
								8			0.5698				8			4.2323				8			0.8963				8			0.6263
								10			0.5647				10			0.6873				10			0.9229				10			0.719909
								12			0.5765				12			0.63243				12			5.0076				12			0.738487
								14			3.4479				14			0.4257				14			0.9276				14			0.72339
								16			3.15053				16			0.209				16			0.8839				16			0.739709
							LE Rh10O2 + N2	Kick0680						LE Rh10O3 + N2	Kick0549						LE Rh10O4 + N2	Kick0609						LE Rh10O5 + N2	Kick0757
								2			-69.4244				2			0.7913				2			0.625613				2			0
								4			0.3328				4			0.501				4			3.8919				4			2.8189
								6			3.496				6			0.3902				6			-3.4486				6			0.4091
								8			0.3534				8			-78.8263				8			0.5261				8			0.3553
								10			0.3727				10			0.365				10			0.4646				10			0.3791
								12			0.3532				12			0.2976				12			0.423727				12			0.437692
								14			0.3742				14			0.1021				14			0.2577				14			0.4505
								16			0.315376				16			-0.0866167				16			-0.0436				16			0.4088

## Sheet: notes
Reading TPSS and BP86 tabs:
CO to CO2
Rh10O5 to Rh10O4
	Structure_ID	Cluster Energy (eV)	Stoichiometry Energy (eV)	DE (eV)
LE Rh10O5 + CO	Kick0757	-89.4605	-102.835	0	At the top of the page is the reference (octet) reaction path for each of the 9 reactions, DE is with respect to the energy of the lowest energy Rh10Om octet structure
Matching Intermediate (Rh10O5-CO)	int_guess	-104.807	-104.807	-1.9714
Matching Rh10O4 + CO2	Kick0514	-82.128	-102.256	0.5792
Matching Rh10O5 + CO	reactant_guess	-89.3112	-102.686	0.1493
Matching Intermediate (Rh10O5-CO)	int_guess_2	-104.609	-104.609	-1.7742
LE Rh10O4 + CO2	Kick0609	-83.2903	-103.418	-0.5831
LE = Lowest Energy
CO	-13.3747
CO2	-20.128
octet reference energies presented in blue
CO to CO2
Rh10O5 to Rh10O4
	Structure_ID + multiplicity	Cluster Energy (eV)	Stoichiometry Energy (eV)	DE (eV)
LE Rh10O5 + CO	Kick0757	-89.4605	-102.835	0
	2
	4	-89.465	-102.84	-0.0045	In each block in the bottom part of the page are the energies of each structure at multiplicities 2-20 (BP86) and 2-16 (TPSS), DE is with respect to the energy of the lowest energy Rh10Om octet structure
	6	-89.4582	-102.833	0.0023
	8	-89.4605	-102.835	0
	10	-89.4244	-102.799	0.0361
	12	-89.4406	-102.815	0.0199
	14	-89.2381	-102.613	0.2224
	16	-89.0851	-102.46	0.3754
Reading Diff tabs:
It is only sensible to compare the relative energies - i.e. each value in both Diff tabs represents a difference-of-a-difference. Differences are calculated as BP86 - TPSS.
i.e. cell E5 on the 'Diff CO to CO2' tab tells us that the BP86 relative energy of the intermediate Rh10O5-CO structure is 0.35 eV higher than the same path calculated with the TPSS functional.
Similarly, cell E6 indicates that the TPSS-calculated product energy is 0.5 eV higher than the BP86-calculated value.
Cells E23-E30 indicate that the ordering of multiplicities for the lowest energy Rh10O5 structure (Kick0757) is the same for both functionals.
